# Supplementary material for: Polypyrrole-chitosan conductive biomaterial synchronizes cardiomyocyte contraction and improves myocardial electrical impulse propagation
Source: PubMed Central journal article supplement — Theranostics. 2018 Apr 9;8(10):2752–64. doi: 10.7150/thno.22599 (PMC5957007; doi:10.7150/thno.22599), 2018-04-09

## SUPPLEMENTAL MATERIAL

for

### **Polypyrrole-chitosan conductive biomaterial synchronizes cardiomyocyte contraction and improves myocardial electrical impulse propagation**

Zhi Cui<sup>1</sup>, Nathan C. Ni<sup>1</sup>, Jun Wu<sup>1</sup>, Guo-Qing Du<sup>1</sup>, Sheng He<sup>1</sup>, Terrence M. Yau<sup>2</sup>, Richard D. Weisel<sup>1,2</sup>, Hsing-Wen Sung, PhD<sup>3</sup>, Ren-Ke Li<sup>1,2,\*</sup>

<sup>1</sup>Toronto General Hospital Research Institute, Division of Cardiovascular Surgery, University Health Network, Toronto, Ontario, Canada

<sup>2</sup>Department of Surgery, Division of Cardiac Surgery, University of Toronto, Toronto, Ontario, Canada

<sup>3</sup>Department of Chemical Engineering, National Tsing Hua University, Hsinchu, Taiwan

**\* Address for correspondence:**

Ren-Ke Li, MD, PhD

Toronto Medical Discovery Tower,

Room 3-702, 101 College St,

Toronto, ON, Canada M5G 1L7

Tel.: 1-416-581-7492; Fax: 1-416-581-7493

E-mail: [renkeli@uhnres.utoronto.ca](mailto:renkeli@uhnres.utoronto.ca)

## Supplementary Figure and Movie Legends

### *Figure S1*

**Effect of cryoinjury on rat myocardial function.** Scar formation in adult rat left ventricle was induced via cryoinjury. Measurement of ejection fraction via echocardiography (A) did not reveal any functional differences in hearts pre- (n= 6) and 7 days post-injury (B, n = 5). Data is presented as mean±SEM.

### *Movie S1*

Video recording of calcium signal propagation in physically-isolated CM clusters grown on polystyrene culture dishes under low magnification (0.63X) view. Propagation waves in the central (top) and peripheral (bottom) clusters do not interact.

### *Movie S2*

Video recording of calcium signal propagation of CMs cultured on polystyrene dishes under high magnification (6.3X) view showing individual cell calcium signal.

### *Movie S3*

Video recording of calcium signal propagation in physically-isolated CM clusters grown on CHI-coated culture dishes under low magnification (0.63X) view. Propagation waves in the central (bottom) and peripheral (top) clusters do not interact.

### *Movie S4*

Video recording of calcium signal propagation of CMs cultured on CHI-coated culture dishes under high magnification (6.3X) view showing individual cell calcium signal.

### ***Movie S5***

Video recording of calcium signal propagation in physically-isolated CM clusters grown on PPY:CHI conductive hydrogel-coated culture dishes under low magnification (0.63X) view. The majority of propagation waves originating from the peripheral (right) clusters are able to propagate to and activate the central CM cluster (left).

### ***Movie S6***

Video recording of calcium signal propagation of CMs cultured on PPY:CHI-coated dishes under high magnification (6.3X) view showing individual cell calcium signal.

### ***Movie S7***

Video recording of voltage-sensitive dye measured electrical signal propagation in a healthy control heart. The left panel contains the black and white raw image, the central panel contains the processed voltage-sensitive dye signal pseudocolor map, and the right panel contains the overlay of the two.

### ***Movie S8***

Video recording of voltage-sensitive dye measured electrical signal propagation in a saline-treated cryoinjured heart. The left panel contains the black and white raw image, the central panel contains the processed voltage-sensitive dye signal pseudocolor map, and the right panel contains the overlay of the two.

### ***Movie S9***

Video recording of voltage-dye measured electrical signal propagation in a CHI-treated cryoinjured heart. The left panel contains the black and white raw image, the central panel

contains the processed voltage-sensitive dye signal pseudocolor map, and the right panel contains the overlay of the two.

***Movie S10***

Video recording of voltage-dye measured electrical signal propagation in a PPY:CHI-treated cryoinjured heart. The left panel contains the black and white raw image, the central panel contains the processed voltage-sensitive dye signal pseudocolor map, and the right panel contains the overlay of the two.

Figure S1

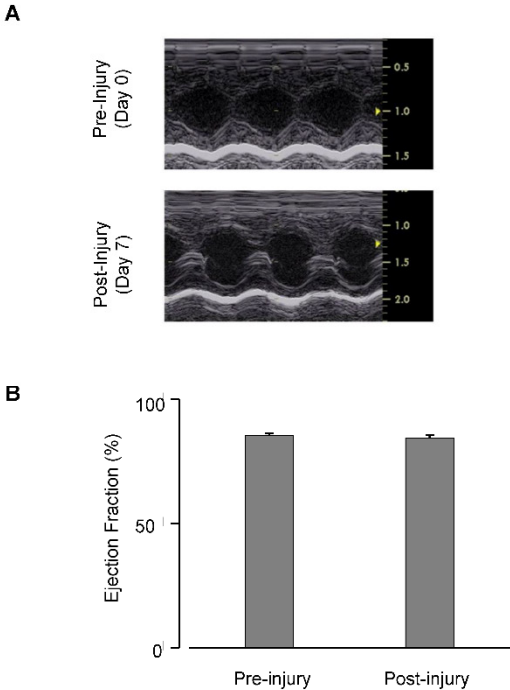

Supplement: thnov08p2752s11.pdf [file thnov08p2752s11.pdf]
